# Supplementary material for: Characterization and Expression Analysis of Four Cadmium-Tolerance-Associated Genes of Avicennia marina (Forsk.)
Source: MDPI journal article supplement (doi:10.3390/biology12020216), 2023-01-30
Supplement: s1 [file s1]

# Characterization and Expression Analysis of Four Cadmium-Tolerance-Associated Genes of *Avicennia marina* (Forsk.)

Jinfeng Yu <sup>1,2,†</sup>, Jicheng Zhang <sup>1,3,†</sup> and Hualong Hong <sup>1,\*</sup>

<sup>1</sup> Key Laboratory of the Ministry of Education for Coastal and Wetland Ecosystems, School of Life Sciences, Xiamen University, Xiamen 361102, China

<sup>2</sup> Xiamen Innovax Biotech, Xiamen 361022, China

<sup>3</sup> Frasergen, Wuhan 430075, China

\* Correspondence: honghl@xmu.edu.cn

† These authors contribute equally to this work.

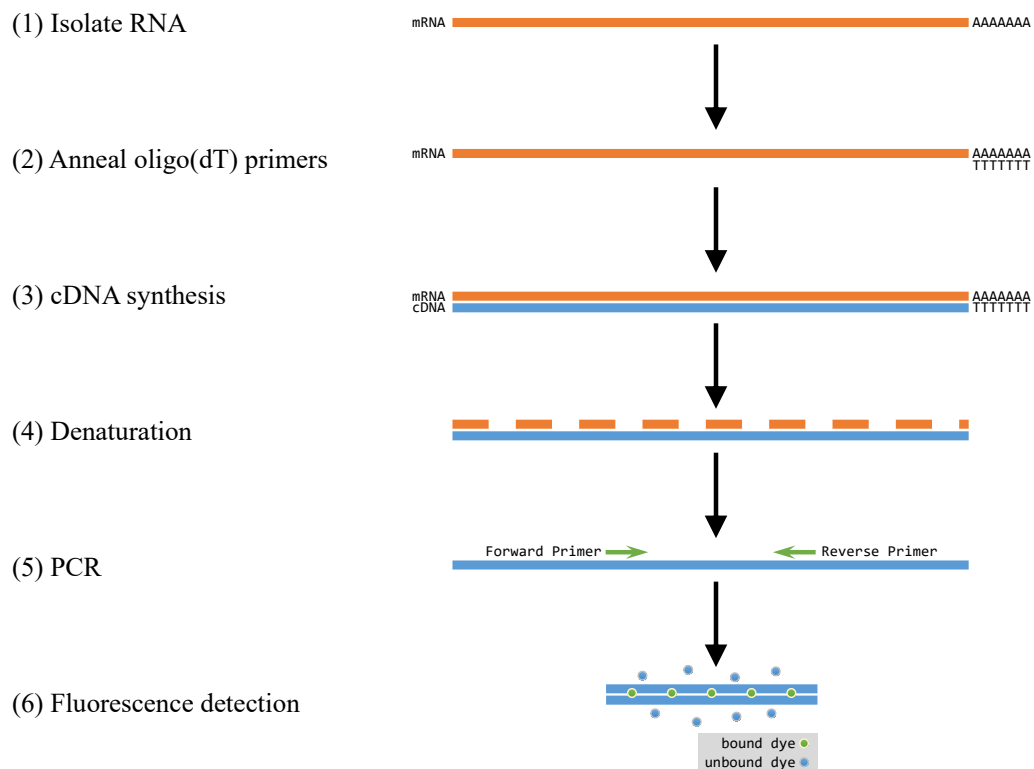

**Figure S1 Diagram for the RT-qPCR protocol.**

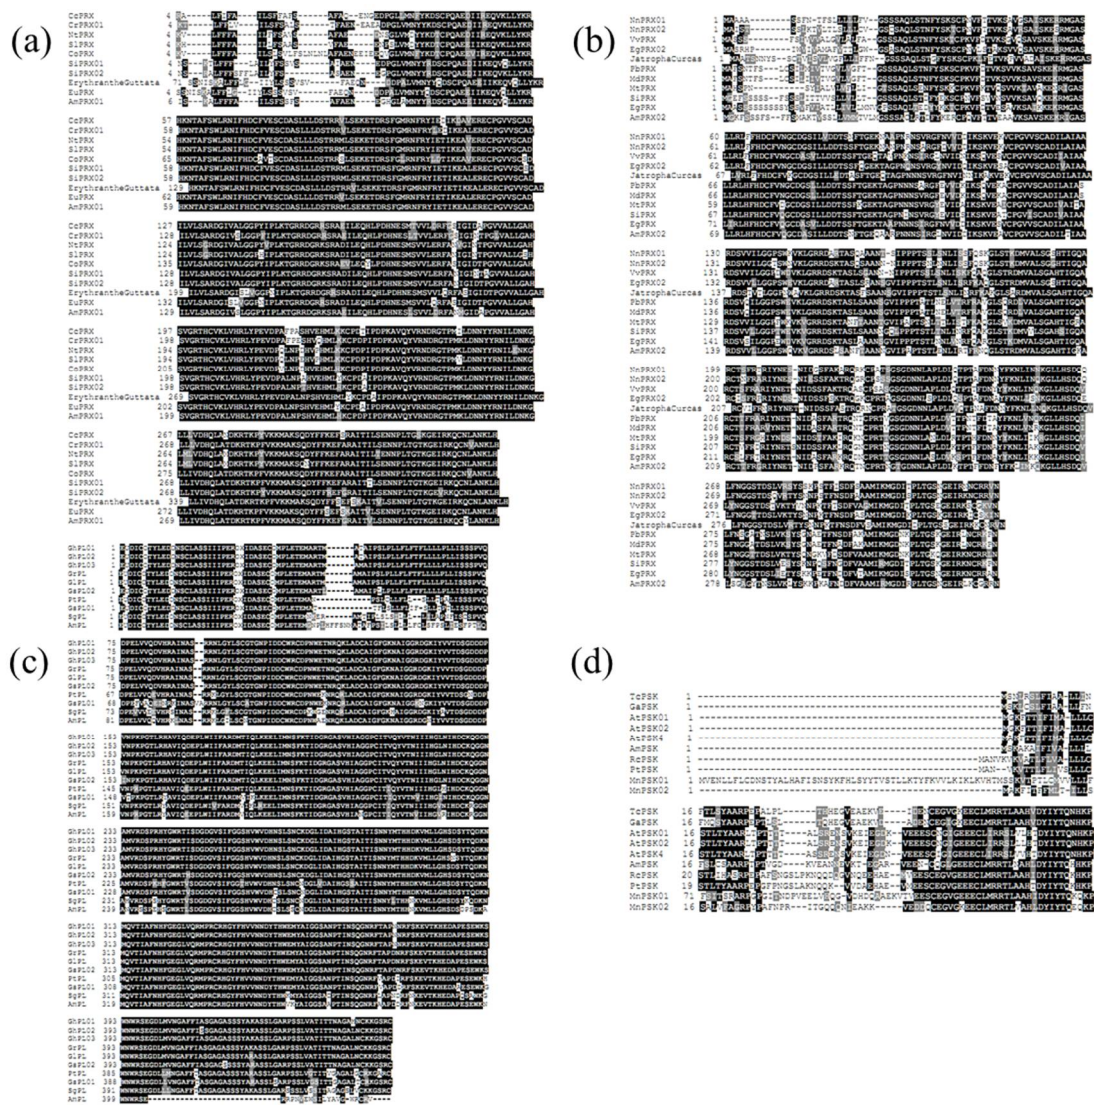

**Figure S2 Multiple sequence alignment of PRX (a) (b), PL (c), and PSK (d) proteins.**

The deduced amino acid sequences of PRX, PL, and PSK proteins using MEGA 5.1.

**Table S1 Primers used for RACE in this study**

| Primers      | Sequences (5'-3')         |
|--------------|---------------------------|
| AmPL-GSP1    | TGCTCTGGCGAGGACCGCACATT   |
| AmPL-GSP2    | GCAGAGAACCGCCAAAAGTTAGCCG |
| AmPL-NGSP1   | GCATAACGGAGTGTCCCCGGCCT   |
| AmPL-NGSP2   | TGGGGACGACGACCCTGTCAACC   |
| AmPRX2-GSP1  | CGCTTCTCTCCTTCGCCTCCACTTT |
| AmPRX2-GSP2  | GGAATCACACCGTTATTTGCCGC   |
| AmPRX2-NGSP1 | GCTTCGTTCAAGGCTGTGATGCGTC |
| AmPRX2-NGSP2 | CGGGCAGCAATGGTTAGGATGTCG  |

**Table S2 Primers used for qRT-PCR analysis in this study**

| Gene          | Sequences (5'-3')  |                      |
|---------------|--------------------|----------------------|
|               | Forward            | Reverse              |
| <i>Am18S</i>  | CCCGTTGCTGCGATGAT  | GCTGCCTTCCTTGGATGTG  |
| <i>AmPRX1</i> | AGCCACGGACAAGAGGAC | ACCCTTTGTGCCAGTGAG   |
| <i>AmPRX2</i> | CAATGGTATGTGCTCCTG | TCGTTATCAGCCAACTTTA  |
| <i>AmPL</i>   | ACGACCCTGTCAACCCTA | CATTATCAATTCCTCCTTCA |
| <i>AmPSK</i>  | TTCTCCTGCTCTTCTCCC | ACTCTGGCTCCCTCTGTC   |
